# Supplementary material for: Retention of Basic Sciences Knowledge at Clinical Years: A single Institute Study from Sudan
Source: Research Square preprint supplement (doi:10.21203/rs.3.rs-7601399/v1), 2025-10-27
Supplement: Supplementary file 1 [file d138c18b18cf84a9f14832e4.docx]

**Questionnaire on Retention of Basic Sciences knowledge at clinical years : A single Institute Study from Sudan**

**Introduction**

**We are group of researcher and staff members in Gizera and Kassala universities (Fatima Abas, Huda Haroun, Hashim Eltom and AbdelAziem AbdAllah) concern about the medical education in Sudan. WELCOME AND THANKS for your response to participate in this study. This questionnaire is designed to investigate the retention of basic sciences knowledge at clinical years. And by answering our questions; you will help the students learn at** **their maximum potential. It will take about 40-60 minutes to be filled and answered. The questionnaire contain general characteristics and questions on what you learnt in the previous years (Anatomy, Physiology and Biochemistry). Please note that your information IS NOT personally identifiable and all responses are CONFIDENTIAL. Don't hesitate to ask us if any question is not clear enough.**

| Section 1 : Personal data |
| --- |

| **Write answer here** | **Respondent Choices** | **Question** | No |
| --- | --- | --- | --- |
|  |  | Index Number | 1 |
|  | 1. Male 2. Female | Gender | 2 |
|  | 1.Batch 25th  2.Batch 26th | Batch | 3 |

**Section II**

**Please answer all the following questions by encircle the letter of correct answer**

1. **In anaerobic condition, which organ produces the main raw for the process of gluconeogenesis**?

A. muscle b. liver c. brain d. heart

**2. Phenylalanine is the precursor of:**

a. tyrosine b. alanine c. histidine d. proline

**3..Phenylketonuria is due to deficiency of:**

a. phenylhydroxylase b. tyrosinase c. tyrosine hydroxylase d. homogentisate oxidase

**4. The pigment formed in heme degradation transported to liver in combination with:**

a. Transferrin b. Albumin c. Globulin d. Haptoglobin

**5. Accumulation of bilirubin pigment results in:**

a. liver cirrhosis b. jaundice c. fatty liver d. anemia

**6. Which of the following minerals is involved in the structure of hemoglobin?**

a. Sodium b. chromium c. iron d. potassium

**7. Iron therapy is ineffective in which of the following conditions:**

a. Chronic blood loss b. Inadequate Fe-intake in diet c. Hypochromic anaemia of pregnancyd. d. Thalassaemia minor (α-chain thalassaemia) **8. The rate limiting step in cholesterol synthesis to produce mevalonate is catalyzed by:**

a. HMGCoA reductase b. thiolase c. HMGCoA synthase d. mevalonate kinase

**9. The major source of cholesterol in arterial smooth muscle cells is from:**

a. LDL b. HDL c. Chylomicrons d. VLDL**10. The primary cation in intracellular fluid is:**

a. potassium b. calcium c. sodium d. magnesium

11. **In which part of the respiratory system, gaseous exchange takes place?**

(a) Alveoli (b) Pharynx (c) Larynx (d) Trachea

**12. Activation of blood coagulation pathway is by:**

a. prothrombin b. Ca+2 c. thrombin d. fibrinogen

**13. Cardiac muscle differ from skeletal muscle in:**

a. Striated b. Has thin actin c. Has gap junction d. Has thick actin

**14. Left ventricular heart failure leads to:**

a. Increased pulmonary capillary hydrostatic pressure b. Engorged neck veins c. Bradycardia d. Increased myocardial contractility

**15. Surfactant:**

a. Is a glycoprotein b. Is produced in the fetus early in pregnancy c. Prevents development of pulmonary edema d. Acts to increase surface tension of fluid in the alveoli

**16. A heart rate of 125 beats per minute could be correctly termed:**

A) bradycardia. B) tachycardia. C) an arrhythmia. D) fibrillation.

**17. The hormone that inhibit gastric secretion and motility is...**

a- Gastrin b- histamine c- secretin d- Pepsin

**18. ECGs:**

a. provide direct information about the heart function.

b. are most useful in diagnosing heart murmurs.

c. show the summed electrical potentials generated by all cells of the heart.

d. have two major components: waves and nodes.

**19. The skin is derived from:**

a. ectoderm and endoderm b. ectoderm and mesoderm c. mesoderm and endoderm d. ectoderm, mesoderm, and endoderm

**20. Which of the following provides sensory innervation to the forehead?**

a. Ophthalmic branch of the trigeminal nerve b.Maxillary branch of the trigeminal nerve c. Cervical branch of facial nerve d. Temporal branch of facial nerve

**21. In embryonic development, RBCs is manufactured in:**

a. liver b. yolk sac c. bone marrow d. spleen

**22. Regarding lymphatic drainage: the Right gastric node drain:**

a. body of stomach b. Antrum of stomach

c. fundus of stomach d. pylorus of stomach

**23. The presence of the followings in the amniotic fluid indicates an encephaly:**

a. glucose b. blood c. lymphocytes d. alpha fetoprotein

**24. Which of the following bone is called collar bone?**a) Acetabulum b) Pelvic c) Scapula d) Clavicle

**25. A flattened or shallow articulating surface of a bone is called:**

a. tubercle b. fossa c. fovea d. facet

**26. 3rd ventricle is the cavity of the:**

a. metencephalon b. myelencephalon c. mesencephalon d.diencephalon

**27. The embryonic origin of thyroid gland is:**

a.pharynx b. larynx c. trachea d. tongue

**28. A 45-year-old male presents to the Emergency Department with complaints of drowsiness and fatigue. He skipped breakfast this morning and had an intense workout session earlier. He denies any recent illness, alcohol consumption, or substance use. He diagnosed as hypoglycemic due to excessive production of which of the followings?**

A. Pyruvic acid b. lactic acid c. glutaric acid d. oxaloacetic acid

**29. Edema due to high capillary permeability results from:**

a. filariasis b. renal failure c. burn d. hepatic failure

**30. Acute bacterial infections are characterized by high count of:**

a. neutrophils b. basophils c. monocytes d. lymphocytes

**31. A 55-year-old female presents with yellowing of the skin and eyes, along with easy bruising and occasional nosebleeds. She reports progressive jaundice over the past three weeks, accompanied by dark urine, pale stools, and generalized itching. She also mentions increased bruising on her arms and legs without significant trauma and occasional bleeding from her gums while brushing. She denies fever, significant abdominal pain, or recent weight loss. Which of the following vitamins is associated with this condition?**

a. vitamin K b. vitamin A c. vitamin E d. vitamin D

**32. A patient presents with jaundice, abdominal pain, and nausea. Clinical laboratory studies give the following results: Serum bilirubin: Increase conjugated bilirubin, Urine urobilinogin not present, urinary bilirubin present. What is the most likely cause of the jaundice?**a. Decreased hepatic conjugation of bilirubin b. Decreased hepatic uptake of bilirubin c. Decreased secretion of bile into the intestine d. Increased hemolysis

**33. A 2-year-old child was brought to his pediatrician for evaluation of gastrointestinal problems. The parents report that the boy has been listless for the last few weeks. Lab tests reveal a microcytic, hypochromic anemia. Blood lead levels are elevated. Which of the enzymes listed below is most likely to have higher-than-normal activity in the liver of this child?**a. δ-Aminolevulinic acid synthase b. Ferrochelatase
c. Heme oxygenase d. Porphobilinogen synthase

**34. An obstetrician injects local anesthetic to block sensation from the perineum during the third stage of labor. After verifying a bony landmark transvaginally (through the vagina), she blocks the pudendal nerve. Which of the following bony landmarks should she use to locate the pudendal nerve?**

a. Ischial spine b. External as of cervix c. Sacral promontory Pubic symphysis

**35. A 58-year-old woman with a right ovarian tumor undergoes an ovariectomy, which removes the ovary and a portion of the suspensory ligament. What important artery follows the path of the suspensory ligament?**

a. Ovarian artery b.Uterine artery c. Cervical artery d.Vesical artery

**36. Insufficient amount of surfactant in premature infant causes:**

a. respiratory distress b. asthma c. pulmonary fibrosis d. pulmonary hypertension
